# Supplementary material
Source: PubMed Central journal article supplement (PMC3411949)
Supplement: 1207219109_pnas.201207219SI.pdf [file 1207219109_pnas.201207219SI.pdf]

# Supporting Information

Do et al. 10.1073/pnas.1207219109

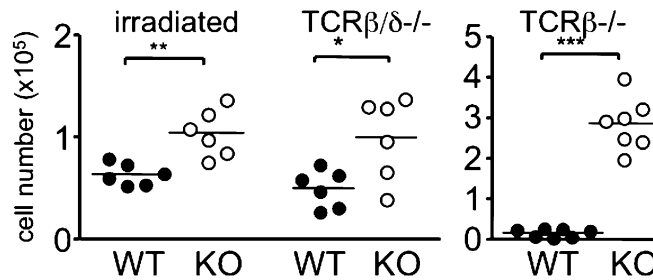

**Fig. 51.** Naive CD8 T cells derived from MHC II<sup>-/-</sup> mice expand greater than WT naive CD8 T cells. A total of  $1 \times 10^6$  naive Thy1.1 WT and MHC II<sup>-/-</sup> CD8 T cells were transferred into indicated lymphopenic recipients. Recipients were killed at 7 d posttransfer. Donor CD8 T-cell numbers in the lymph nodes (LNs) were enumerated by flow analysis. Each symbol represents an individually tested mouse.

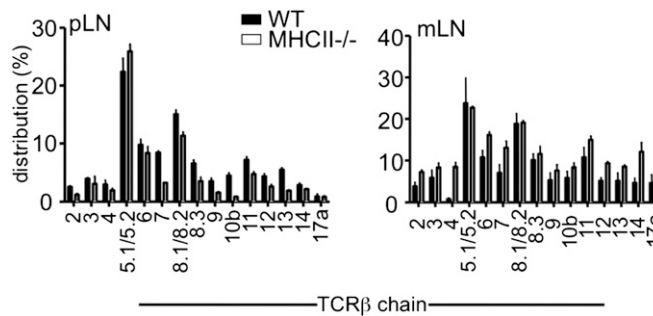

**Fig. 52.** TCR-V $\beta$  expression of WT and MHC II<sup>-/-</sup> naive CD8 T cells after transfer into lymphopenic recipients. A total of  $1 \times 10^6$  naive Thy1.1 WT and MHC II<sup>-/-</sup> CD8 T cells were transferred into TCR $\beta$ <sup>-/-</sup> recipients. TCR distribution of the Thy1.1<sup>+</sup> donor CD8 T cells in the peripheral LNs and mesenteric LNs were examined at 7 d after transfer. The results shown are representative of three individually tested recipients.

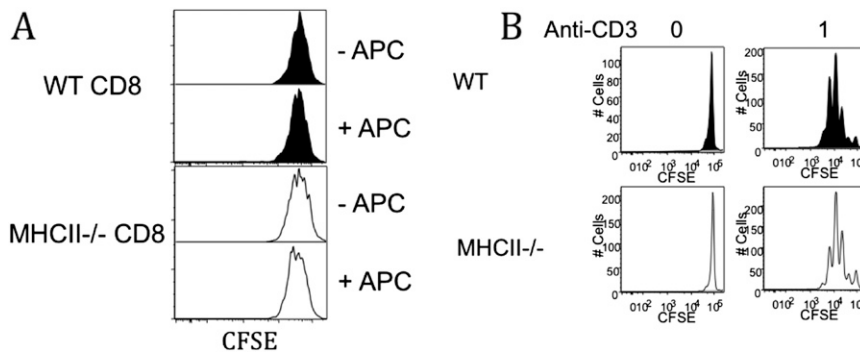

**Fig. 53.** In vitro proliferation of WT and MHC II<sup>-/-</sup> CD8 T cells (A) WT and MHC II<sup>-/-</sup> CD8 T cells transferred into TCR $\beta$ <sup>-/-</sup> recipients were FACS-sorted from the recipients at 7 d posttransfer, CFSE-labeled, and cultured with MHC II-expressing splenocytes for 3 d. (B) FACS-sorted naive WT and MHC II<sup>-/-</sup> CD8 T cells were stimulated with immobilized anti-CD3 and anti-CD28 (0.5  $\mu$ g/mL) mAbs for 3 d. CFSE profiles were subsequently analyzed by FACS.

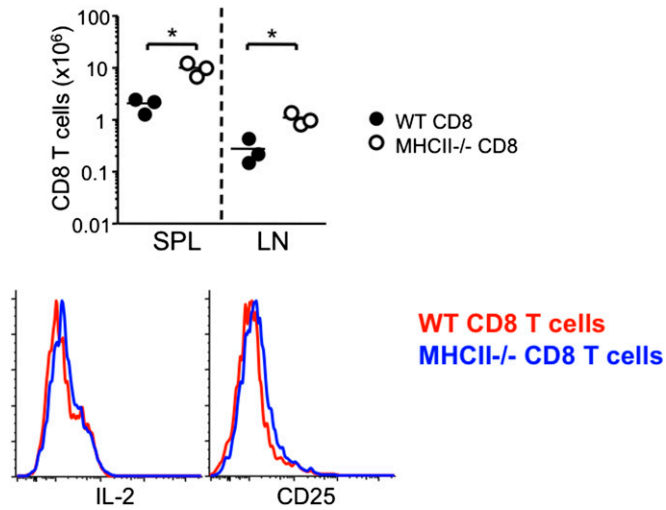

**Fig. 54.** T-cell responses at 14 d posttransfer. WT and MHC II<sup>-/-</sup> CD8 T cells transferred into TCR- $\beta^{-/-}$  recipients were analyzed at 14 d posttransfer. Total cellularity, surface CD25 expression, and intracellular IL-2 expression were examined.

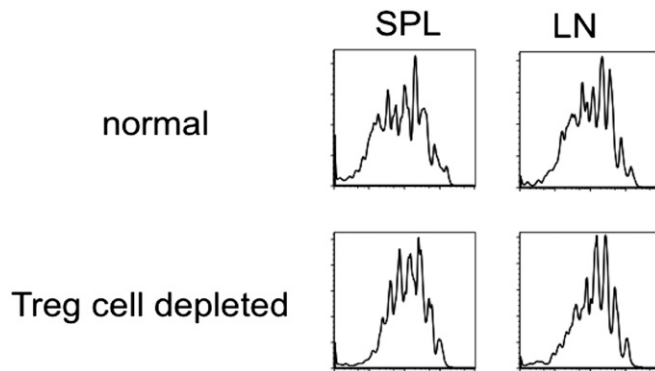

**Fig. 55.** Regulatory T cells have little role in CD8 T-cell hyperresponses. WT mice were treated with anti-CD25 Abs (250  $\mu$ g per mouse) every 3 d to deplete CD25<sup>+</sup> regulatory T cells for 3 wk. Naïve CD8 T cells were then sorted from the Ab-treated mice and transferred into Rag<sup>-/-</sup> recipients. CFSE profiles of the donor cells in the spleen and LN were examined at 7 d after transfer. The results shown are representative of three individually tested recipients.

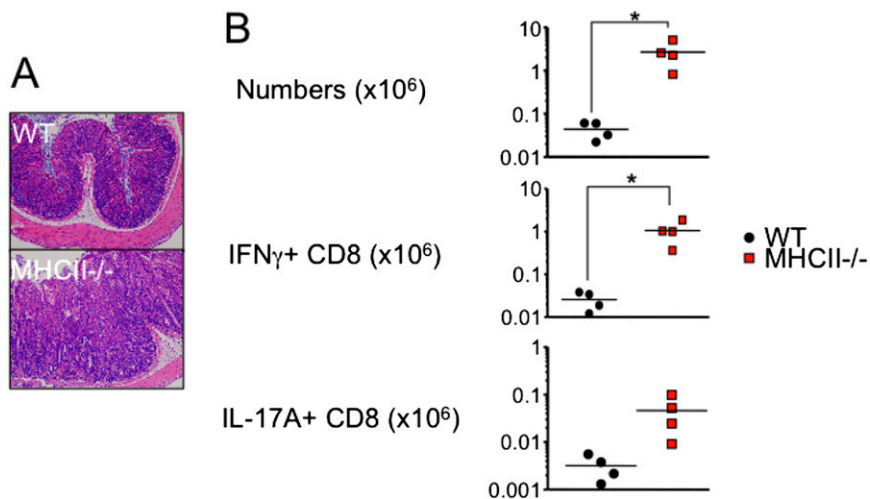

**Fig. 56.** Severe inflammation in the colon after MHC II<sup>-/-</sup> CD8 T-cell transfer. (A) A total of  $1 \times 10^6$  naïve Thy1.1 WT and MHC II<sup>-/-</sup> CD8 T cells were transferred into TCR- $\beta^{-/-}$  recipients. Shown is H&E staining of the colon tissues at 8 wk after transfer. (Original magnification, 10 $\times$ ). (B) mLN cells were isolated at 5 wk posttransfer, and cytokine expression was analyzed by intracellular cytokine staining. Total IFN- $\gamma$ - and IL-17A-producing Thy1.1 CD8 T cells were enumerated. Each symbol represents an individually tested mouse. \* $P < 0.05$ .

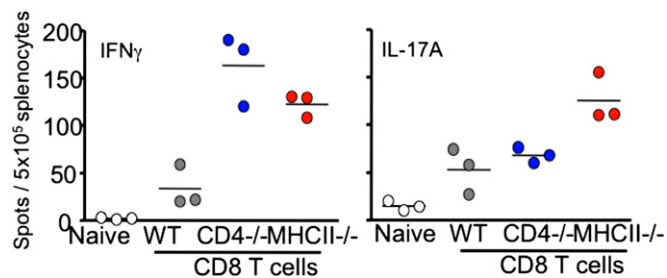

**Fig. 57.** Cytokine expression of hapten-sensitized CD8 T cells. WT, CD4<sup>-/-</sup>, and MHC II<sup>-/-</sup> mice were sensitized with dinitrofluorobenzene as described in *Materials and Methods*. Draining LN CD8 T cells were isolated on day 5. Then  $1 \times 10^7$  cells were transferred into naive WT mice, and the recipients were subsequently challenged on each side of both ears with dinitrofluorobenzene. After 16 h, splenocytes were stimulated with hapten-pulsed syngenic T-cell-depleted splenocytes for enzyme-linked immunosorbent spot analysis. Each symbol represents an individually tested mouse.

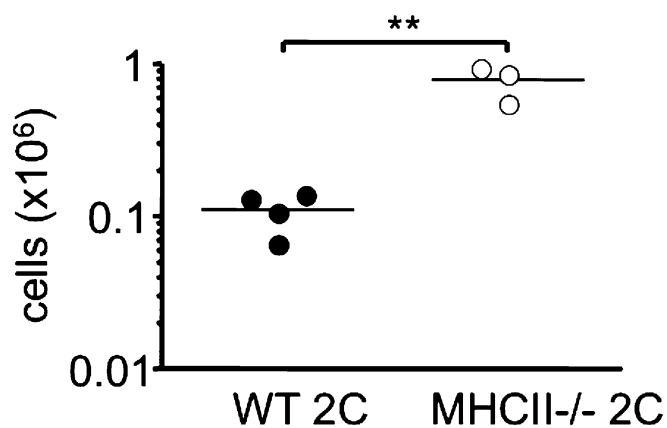

**Fig. 58.** Proliferative responses of MHC II<sup>-/-</sup> 2C TCR Tg cells. WT of MHC II<sup>-/-</sup> 2C TCR Tg naive CD8 T cells were FACS-sorted and transferred into Rag<sup>-/-</sup> recipients. Donor T-cell recovery was examined at 7 d posttransfer. Data shown represent individually tested recipients (LNs).

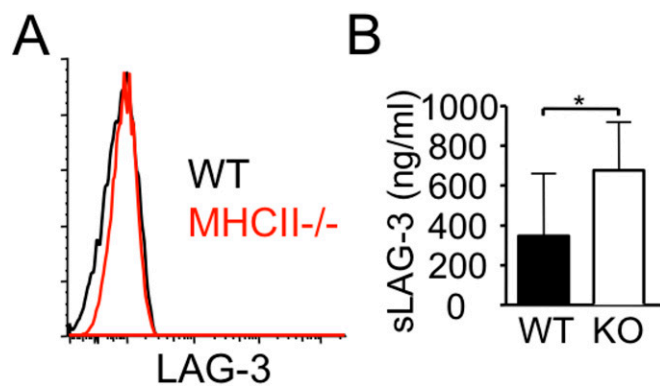

**Fig. 59.** LAG-3 expression in MHC II<sup>-/-</sup> CD8 T cells. (A) Naive WT and MHC II<sup>-/-</sup> CD8 T cells were stained for surface expression of LAG-3. (B) Soluble LAG-3 was examined at 7 d after transfer into Rag<sup>-/-</sup> recipients by ELISA. \* $P < 0.05$ .
